# Supplementary material
Source: Research Square preprint supplement (doi:10.21203/rs.3.rs-9303452/v1)
Supplement: Supplementary file 1 [file 1b1d7b6601c0aac5d64698d1.docx]

**Quality of life after conservative versus elective surgical management of first-episode uncomplicated diverticulitis: a single-center prospective study**

Giuseppe Quero1,2,3, MD, PhD; Lodovica Langellotti1, MD; Antonio Pio Tortorelli1, MD; Vincenzo Tondolo2,4, MD; Beatrice Biffoni1, MD; Davide De Sio1, MD; Marcello Covino2,5, MD; Flavia Taglioni1, MD; Ottavio Scrima1, MD; Maria Chiara Blasi1; Matteo Aulicino1, Claudio Fiorillo1,2,3, MD; Sergio Alfieri1,2,3, MD; Roberta Menghi1,2,3, MD

1 Pancreatic Surgery Unit, Fondazione Policlinico Universitario “Agostino Gemelli” IRCCS, Rome, Italy

2 Dipartimento di Medicina e Chirurgia Traslazionale, Università Cattolica del Sacro Cuore di Roma, Rome, Italy

3 Gemelli Pancreatic Center, CRMPG (Advanced Pancreatic Research Center) Fondazione Policlinico Universitario “Agostino Gemelli” IRCCS, Rome, Italy

4 General Surgery Unit, Fatebenefratelli Isola Tiberina—Gemelli Isola, Rome, Italy

5 Department of Emergency Medicine, Fondazione Policlinico Universitario Agostino Gemelli-IRCCS, 00168 Roma, Italy

**Corresponding author.**

Sergio Alfieri, MD

Pancreatic Surgery Unit

Department of Surgery, Fondazione Policlinico Universitario “Agostino Gemelli”, IRCCS

Largo Agostino Gemelli, 8

00168 Rome, Italy

tel.: +39 06 30 15 51 33

fax: +39 06 30 15 65 20

e-mail : sergio.alfieri@policlinicogemelli.it

**Supplementary Materials - Index**

| **Supplementary Figures** |  |
| --- | --- |
| Figure S1 | *pag. 3* |
| Table S1 | *pag. 4* |
|  |  |

**Supplementary Figure**

**
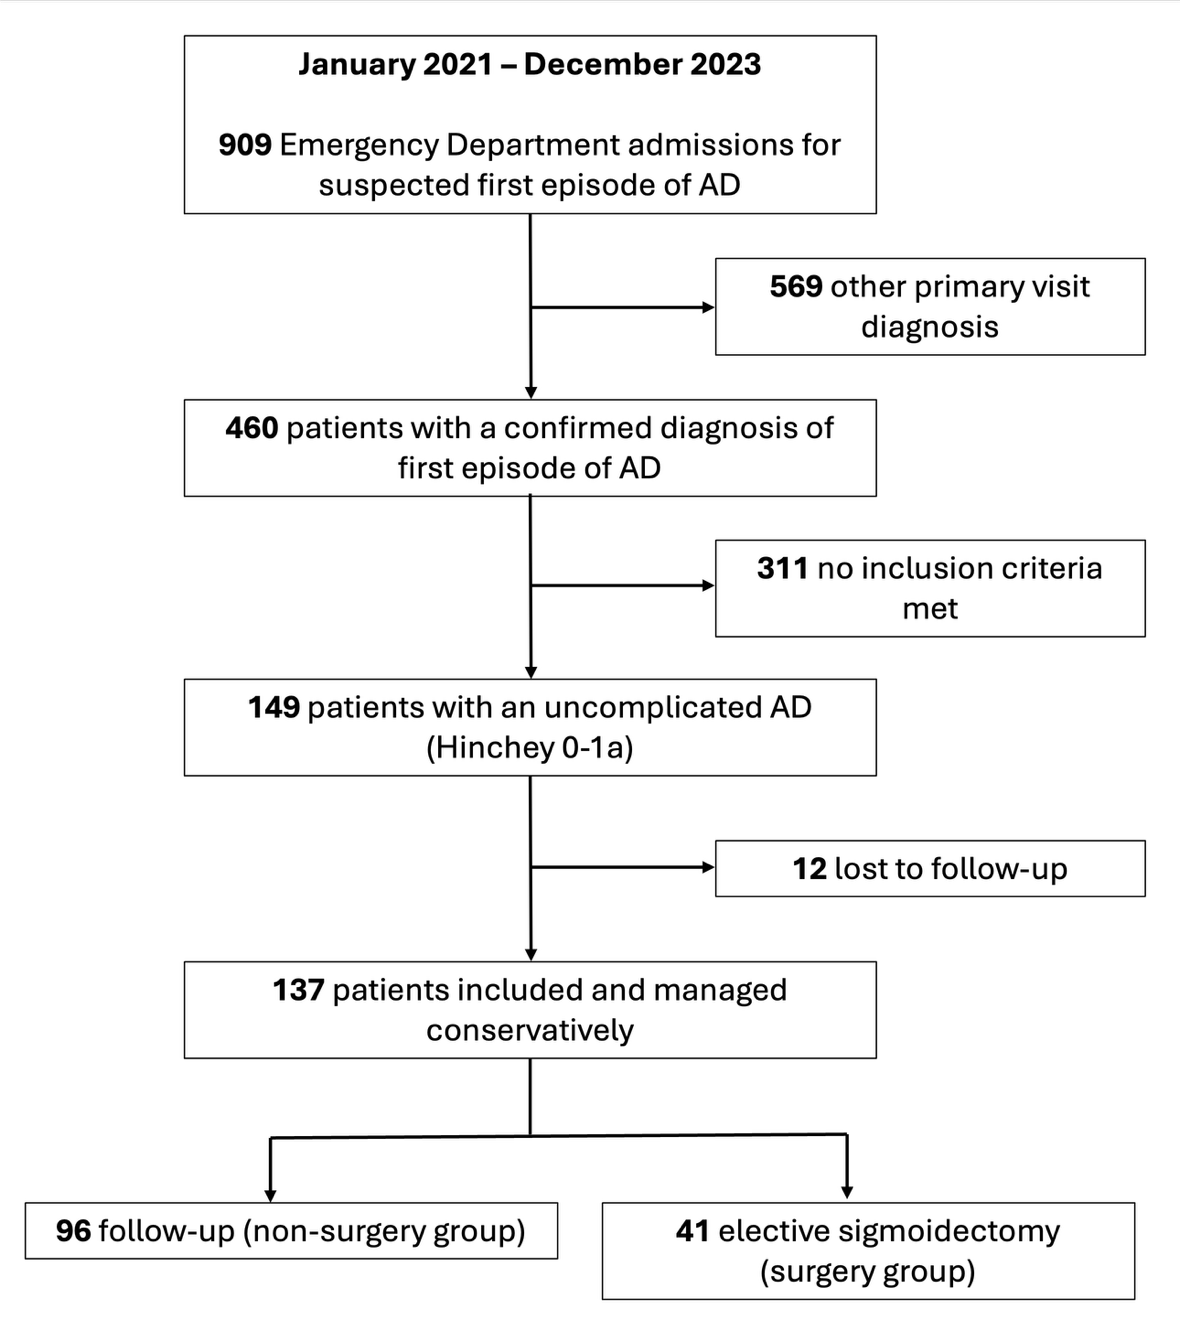
**

**Figure S1.** Study cohort flow diagram

| **Table S1: Longitudinal comparison of DV-QoL subdomains between the non-surgery and surgery cohorts** | | | |
| --- | --- | --- | --- |
|  | **Non-surgery group (n=96)** | **Surgery group (n=41)** | **p** |
| **One-month comparison** | | | |
| **Physical symptoms**, mean (+SD) | 5.8 (+6.09) | 1.05 (+1.43) | **< 0.001** |
| *P1 – bloated, mean (+SD)* | 1.81 (+1.94) | 0.12 (+0.45) | **< 0.001** |
| *P2 – watery stools, mean (+SD)* | 0.77 (+1.33) | 0.27 (+0.73) | **< 0.001** |
| *P3 – bowel movements, mean (+SD)* | 0.94 (+1.65) | 0.44 (+0.88) | **< 0.001** |
| *P4 – nausea, mean (+SD)* | 0.32 (+0.87) | 0.02 (+0.15) | **< 0.001** |
| *P5 – abdominal pain, mean (+SD)* | 1.68 (+1.84) | 0.20 (+0.59) | **< 0.001** |
| **Normalized physical symptoms,** mean (+SD) | 2.19 (+2.44) | 0.42 (+0.57) | **< 0.001** |
|  |  |  |  |
| **Concerns,** mean (+SD) | 4.23 (+4.71) | 0 (0) | **< 0.001** |
| *C1 – Fear of flare-up, mean (+SD)* | 1.42 (+1.73) | 0.07 (+0.34) | **< 0.001** |
| *C2 – Fear of body damage, mean (+SD)* | 1.32 (+1.52) | 0.05 (+0.32) | **< 0.001** |
| *C3 – Fear of something seriously wrong, mean (+SD)* | 1.32 (+1.52) | 0.05 (+0.32) | **< 0.001** |
| **Normalized concerns,** mean (+SD) | 3.52 (+3.92) | 0 (0) | **< 0.001** |
|  |  |  |  |
| **Feelings,** mean (+SD) | 2.82 (+4.30) | 0 (0) | **< 0.001** |
| *F1 – frustration, mean (+SD)* | 0.69 (+1.34) | 0 (0) | **< 0.001** |
| *F2 – anxiety, mean (+SD)* | 0.69 (+1.34) | 0 (0) | **< 0.001** |
| *F3 – irritation, mean (+SD)* | 0.69 (+1.34) | 0 (0) | **< 0.001** |
| *F4 – feeling looked down upon, mean (+SD)* | 0.57 (+1.07) | 0 (0) | **< 0.001** |
| **Normalized feelings,** mean (*+*SD) | 1.76 (+2.67) | 0 (0) | **< 0.001** |
|  |  |  |  |
| **Behavioral changes,** mean (+SD) | 5.03 (+4.68) | 0 (0) | **< 0.001** |
| *B1 – eat less or differently, mean (+SD)* | 2.66 (+1.34) | 0 (0) | **< 0.001** |
| *B2 – dress differently, mean (+SD)* | 0.34 (+0.8) | 0 (0) | **< 0.001** |
| *B3 – avoid social events, mean (+SD)* | 0.82 (+1.43) | 0 (0) | **< 0.001** |
| *B4 – sleep, mean (+SD)* | 0.57 (+1.07) | 0 (0) | **< 0.001** |
| *B5 – miss work or important events, mean (+SD)* | 0.63 (+1.17) | 0 (0) | **< 0.001** |
| **Normalized behavioral changes,** mean (+SD) | 2.52 (+2.34) | 0 (0) | **< 0.001** |
|  | | | |
| **Six-month comparison** | | | |
| **Physical symptoms,** mean (+SD) | 4.52 (+5.43) | 0.59 (1.08) | **< 0.001** |
| *P1 – bloated, mean (+SD)* | 1.41 (+1.75) | 0.07 (0.34) | **< 0.001** |
| *P2 – watery stools, mean (+SD)* | 0.69 (+1.34) | 0.17 (0.62) | **< 0.001** |
| *P3 – bowel movements, mean (+SD)* | 0.72 (+1.46) | 0.27 (0.66) | **< 0.001** |
| *P4 – nausea, mean (+SD)* | 0.23 (+0.78) | 0.02 (0.15) | **< 0.001** |
| *P5 – abdominal pain, mean (+SD)* | 1.45 (+1.66) | 0.05 (0.31) | **< 0.001** |
| **Normalized physical symptoms,** mean (+SD) | 1.81 (+2.17) | 0.23 (0.43) | **< 0.001** |
|  | | | |
| C**oncerns,** mean (+SD) | 3.55 (+4.28) | 0 (0) | **< 0.001** |
| *C1 – Fear of flare-up, mean (+SD)* | 1.47 (+1.25) | 0.06 (+0.24) | **< 0.001** |
| *C2 – Fear of body damage, mean (+SD)* | 1.45 (+1.25) | 0.05 (+0.12) | **< 0.001** |
| *C3 – Fear of something seriously wrong, mean (+SD)* | 1.23 (+1.19) | 0.07 (+0.22) | **< 0.001** |
| **Normalized concerns,** mean (+SD) | 2.95 (+3.56) | 0 (0) | **< 0.001** |
|  | | | |
| **Feelings,** mean (+SD) | 2.46 (+3.85) | 0 (0) | **< 0.001** |
| *F1 – frustration, mean (+SD)* | 0.55 (+1.19) | 0 (0) | **< 0.001** |
| *F2 – anxiety, mean (+SD)* | 0.69 (+1.34) | 0 (0) | **< 0.001** |
| *F3 – irritation, mean (+SD)* | 0.55 (+1.17) | 0 (0) | **< 0.001** |
| *F4 – feeling looked down upon, mean (+SD)* | 0.57 (+1.07) | 0 (0) | **< 0.001** |
| **Normalized feelings,** mean (+SD) | 1.53 (+1.39) | 0 (0) | **< 0.001** |
|  | | | |
| **Behavioral changes,** mean (+SD) | 4.21 (+3.94) | 0 (0) | **< 0.001** |
| *B1 – eat less or differently, mean (+SD)* | 2.43 (+1.45) | 0 (0) | **< 0.001** |
| *B2 – dress differently, mean (+SD)* | 0.22 (+0.71) | 0 (0) | **< 0.001** |
| *B3 – avoid social events, mean (+SD)* | 0.68 (+1.18) | 0 (0) | **< 0.001** |
| *B4 – sleep, mean (+SD)* | 0.35 (+0.89) | 0 (0) | **< 0.001** |
| *B5 – miss work or important events, mean (+SD)* | 0.42 (+0.79) | 0 (0) | **< 0.001** |
| **Normalized behavioral changes,** mean (+SD) | 2.11 (+1.97) | 0 (0) | **< 0.001** |
|  | | | |
| **Twelve-month comparison** | | | |
| **Physical symptoms,** mean (+SD) | 3.83 (+5.10) | 0.10 (+0.64) | **< 0.001** |
| *P1 – bloated, mean (+SD)* | 1.24 (+1.64) | 0.02 (+0.15) | **< 0.001** |
| *P2 – watery stools, mean (+SD)* | 0.55 (+1.16) | 0 (0) | **< 0.001** |
| *P3 – bowel movements, mean (+SD)* | 0.66 (+1.39) | 0.17 (+0.49) | **< 0.001** |
| *P4 – nausea, mean (+SD)* | 0.15 (+0.65) | 0.02 (+0.15) | **0.04** |
| *P5 – abdominal pain, mean (+SD)* | 1.24 (+1.59) | 0 (0) | **< 0.001** |
| **Normalized physical symptoms,** mean (+SD) | 1.53 (+2.04) | 0.09 (+0.25) | **< 0.001** |
|  |  |  |  |
| **Concerns,** mean (+SD) | 3.25 (+4.03) | 0 (0) | **< 0.001** |
| *C1 – Fear of flare-up, mean (+SD)* | 1.35 (+1.17) | 0.05 (+0.14) | **< 0.001** |
| *C2 – Fear of body damage, mean (+SD)* | 1.45 (+1.25) | 0.05 (+0.13) | **< 0.001** |
| *C3 – Fear of something seriously wrong, mean (+SD)* | 1.23 (+1.19) | 0.05 (+0.22) | **< 0.001** |
| **Normalized concerns,** mean (+SD) | 2.70 (+3.35) | 0 (0) | **< 0.001** |
|  |  |  |  |
| **Feelings,** mean (+SD) | 2.23 (+3.75) | 0 (0) | **< 0.001** |
| *F1 – frustration, mean (+SD)* | 0.55 (+1.19) | 0 (0) | **< 0.001** |
| *F2 – anxiety, mean (+SD)* | 0.23 (+1.05) | 0 (0) | **< 0.001** |
| *F3 – irritation, mean (+SD)* | 0.55 (+1.17) | 0 (0) | **< 0.001** |
| *F4 – feeling looked down upon, mean (+SD)* | 0.57 (+1.07) | 0 (0) | **< 0.001** |
| **Normalized feelings,** mean (+SD) | 1.38 (+2.33) | 0 (0) | **< 0.001** |
|  |  |  |  |
| **Behavioral changes,** mean (+SD) | 3.91 (+3.87) | 0 (0) | **< 0.001** |
| *B1 – eat less or differently, mean (+SD)* | 2.27 (+1.48) | 0 (0) | **< 0.001** |
| *B2 – dress differently, mean (+SD)* | 0.22 (+0.71) | 0 (0) | **< 0.001** |
| *B3 – avoid social events, mean (+SD)* | 0.60 (+1.12) | 0 (0) | **< 0.001** |
| *B4 – sleep, mean (+SD)* | 0.40 (+0.82) | 0 (0) | **< 0.001** |
| *B5 – miss work or important events, mean (+SD)* | 0.41 (+0.78) | 0 (0) | **< 0.001** |
| **Normalized behavioral changes,** mean (+SD) | 1.97 (+1.96) | 0 (0) | **< 0.001** |
